# Supplementary material
Source: Springer Nature journal article supplement (https://www.springermedizin.de/resource/supplementary/12935_2012_367_MOESM4_ESM.pdf/9540396)

**A**

0 hrs

6 hrs

12 hrs

MBC1

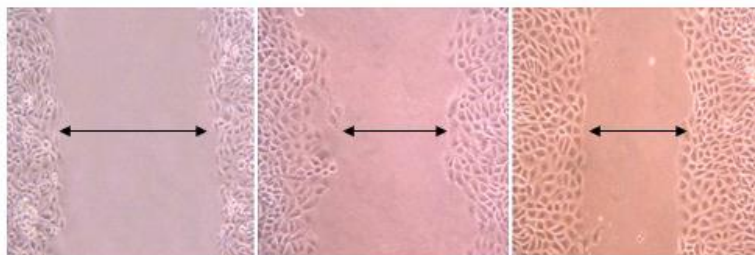

MBC2

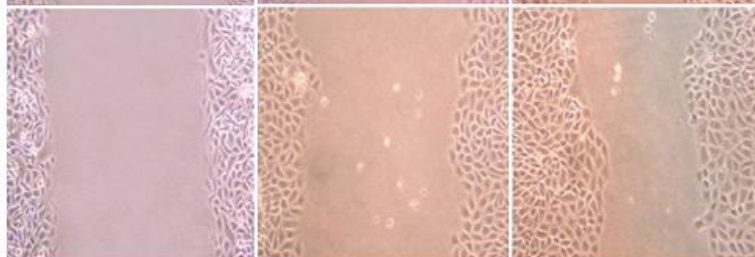

MCF-7

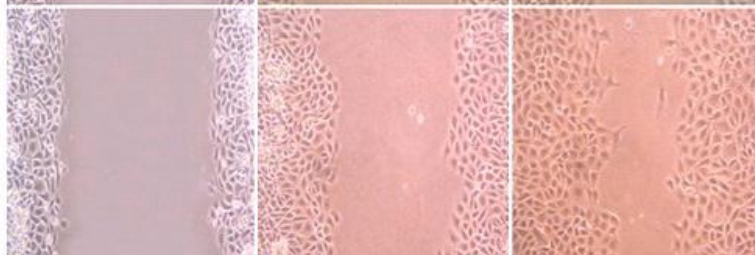**B**

18 hrs

23 hrs

24-26 hrs

MBC1

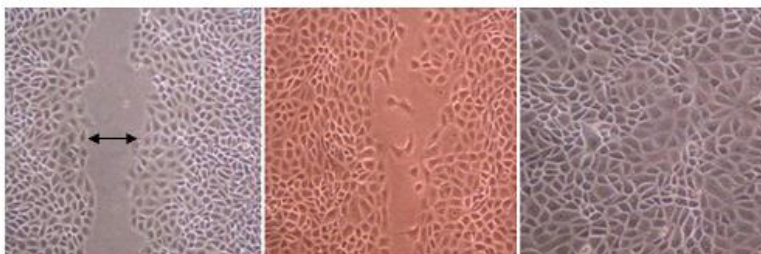

MBC2

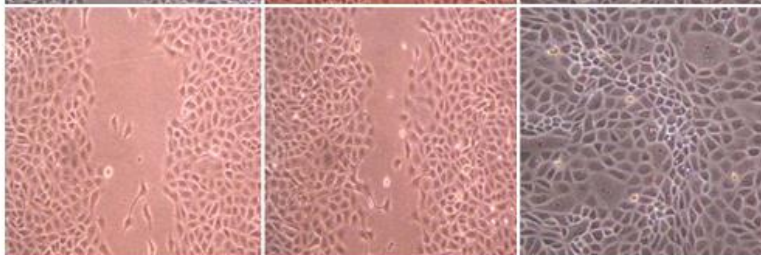

MCF-7

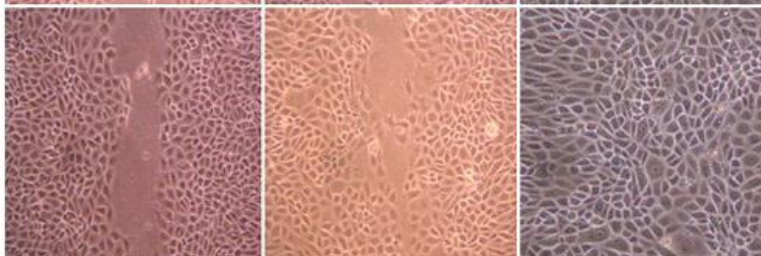

Supplement: MOESM4 [file 9540396]
